# Supplementary material for: Aedes ægypti control in urban areas: A systemic approach to a complex dynamic
Source: PubMed Central journal article supplement (PMC5531422; doi:10.1371/journal.pntd.0005632), 2017-07-27
Supplement: pntd.0005632.s001.pdf [file pntd.0005632.s001.pdf]

### Brief description of the subsystems composing the system

| <b>External subsystems</b> |                                                                                                                                                                                                                                                                                                                 |
|----------------------------|-----------------------------------------------------------------------------------------------------------------------------------------------------------------------------------------------------------------------------------------------------------------------------------------------------------------|
| Climate                    | Rainfall, temperature, and humidity, main climate aspects that condition mosquito reproduction, survival, activity                                                                                                                                                                                              |
| Heard immunity             | Population immunity level, which, if below certain threshold, increases the probability of outbreaks                                                                                                                                                                                                            |
| Government authority       | All government coordination levels (national, state, municipal or other) responsible for defining activities and protocols, including budget, personnel, technical guidelines, approved substances, routines, evaluation and relationship with other areas of government, such as education and health sectors. |
| Socioeconomic situation    | Subsystem combining environmental conditions for mosquito proliferation and socio-cultural aspects related to attitudes                                                                                                                                                                                         |
| <b>Internal Subsystems</b> |                                                                                                                                                                                                                                                                                                                 |
| Urban planning             | All urban interventions, related directly or indirectly to potential mosquito breeding sites, through water distribution, sewerage system and trash collection                                                                                                                                                  |
| Focused intervention       | Vector control strategies for households and peri-domicile, including removal of potential breeding sites, data collection on the vector and population orientation                                                                                                                                             |
| Peri-domicile              | All public spaces, including streets, squares, commuting areas                                                                                                                                                                                                                                                  |
| Buildings                  | Private and public buildings, such as schools, shops, health services, etc                                                                                                                                                                                                                                      |
| Social norm                | A synthesis of locally accepted beliefs and behaviors related to potential breeding sites, such as trash deposits, individual household care                                                                                                                                                                    |
| Media                      | Both traditional media (TV, radio, and newspapers) and the Internet                                                                                                                                                                                                                                             |
| Collective awareness       | General public feeling about the importance of vector control                                                                                                                                                                                                                                                   |
| Peoples' attitude          | A construct synthesizing a set of feelings, beliefs, and behaviors that are reflected in the practical vector control activities                                                                                                                                                                                |
